# Supplementary material for: On the assessment of the moisture transport by the Great Plains low-level jet
Source: Copernicus journal article supplement (doi:10.5194/esd-10-107-2019), 2019-02-18
Supplement: Supplementary file 1 [file esd-10-107-2019-supplement.pdf]

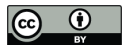

*Supplement of*

## **On the assessment of the moisture transport by the Great Plains low-level jet**

**Iago Algarra et al.**

*Correspondence to:* Iago Algarra ([ialgarra@uvigo.es](mailto:ialgarra@uvigo.es))

The copyright of individual parts of the supplement might differ from the CC BY 4.0 License.

## Captions

**Figure S1:** Monthly variability of the percentage of GPLLJ days.

**Figure S2:** Moisture sources for the 6 case-studies analysed. Green line delimits the 75th percentile of  $(E - P) > 0$  values. The vectors show the wind direction and intensity for each case study at surface level ( $\sim 500\text{m}$  AGL). The purple line shows the position of the moisture-labelling wall used in the WRF simulation.

**Figure S3:** Comparison of 11-days accumulated precipitation for WRF simulations versus CPC gauge-analysis observations throughout the same periods.

**Figure S4:** (a-c)  $q\text{TR}$  in  $\text{g kg}^{-1}$  for the three vertical cross sections at the locations depicted with white lines in Fig. 5 for jet event of July 19, 1999 – Simulation 1. (d-f) same as (a-c) but for  $\phi\text{TR}$  in  $\text{g m (kg s)}^{-1}$ .

**Figure S5:** As Figure S4 but for jet event of July 23, 1983 – Simulation 2.

**Figure S6:** As Figure S4 but for jet event of July 28, 2002 – Simulation 4.

**Figure S7:** As Figure S4 but for jet event of July 14, 2016 – Simulation 5.

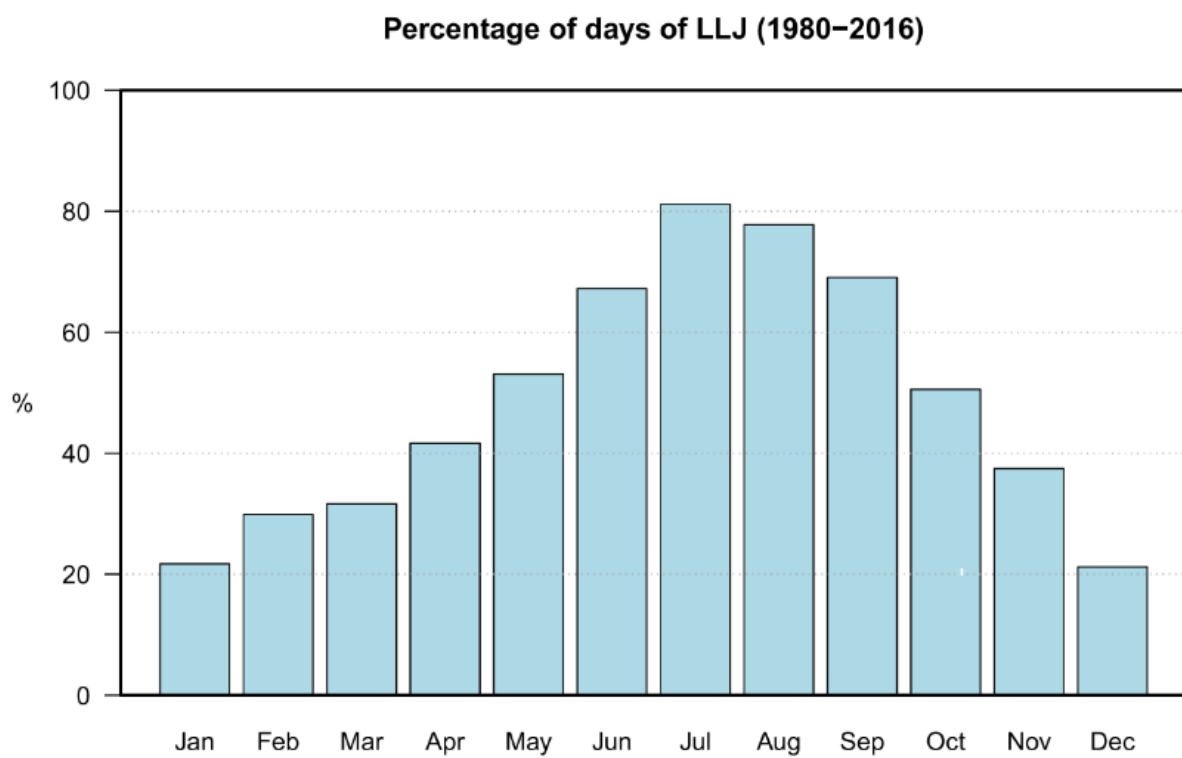

**Figure S1**

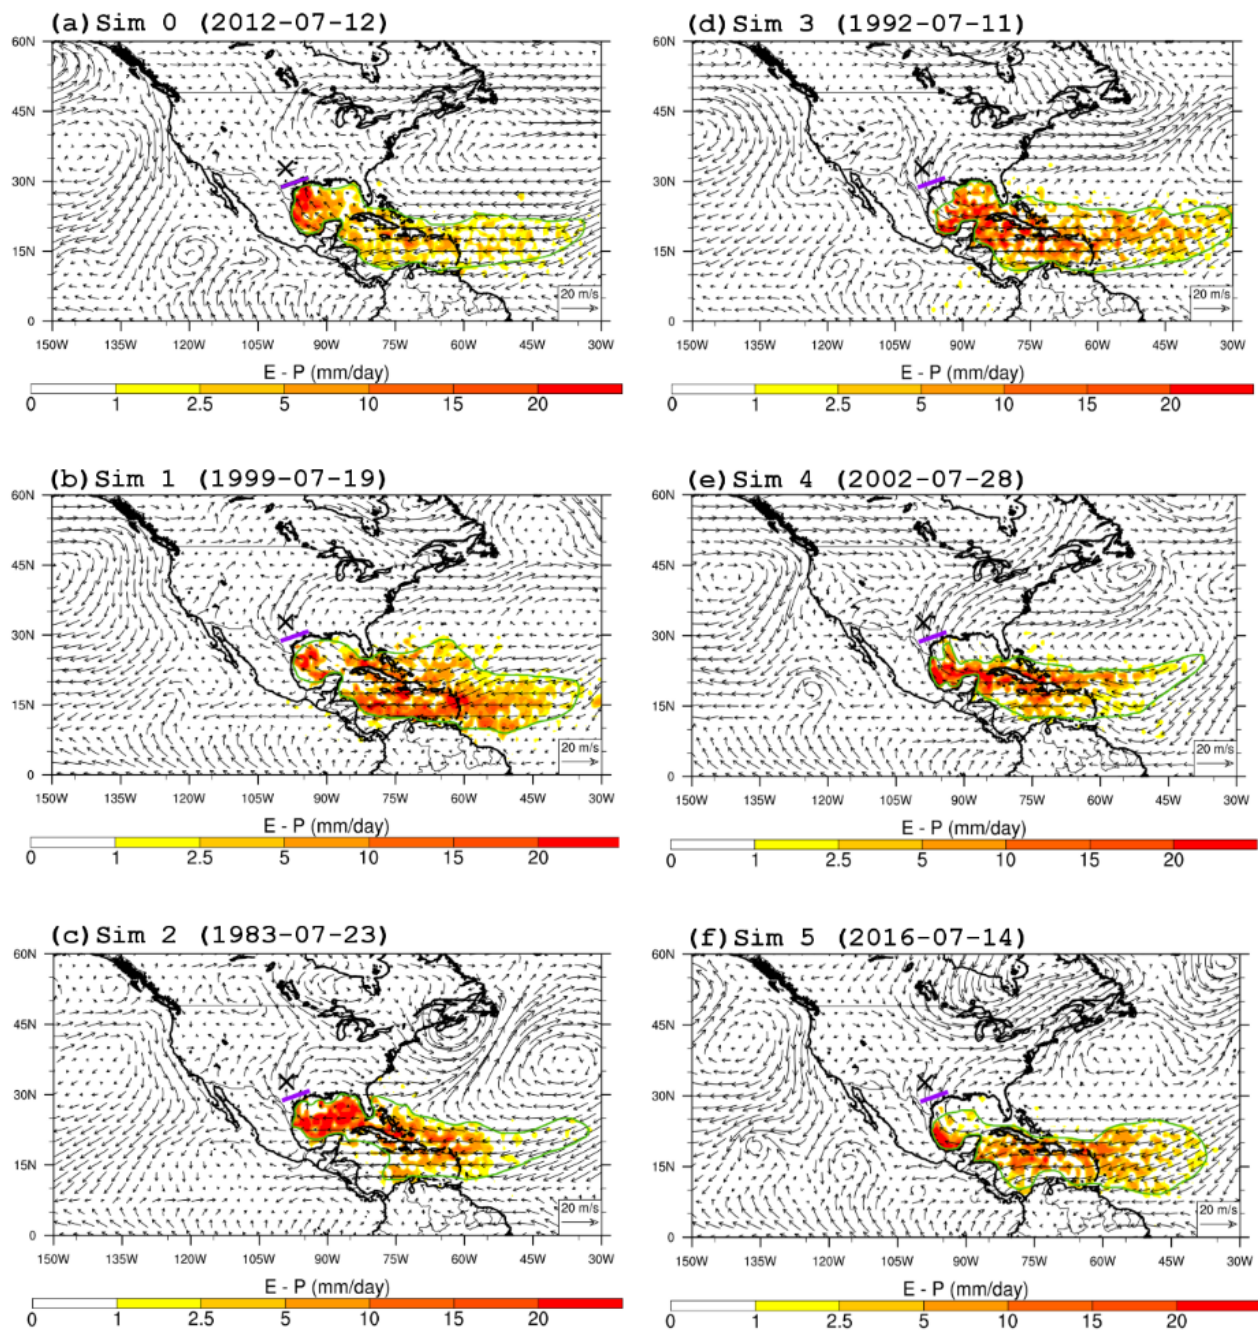

Figure S2

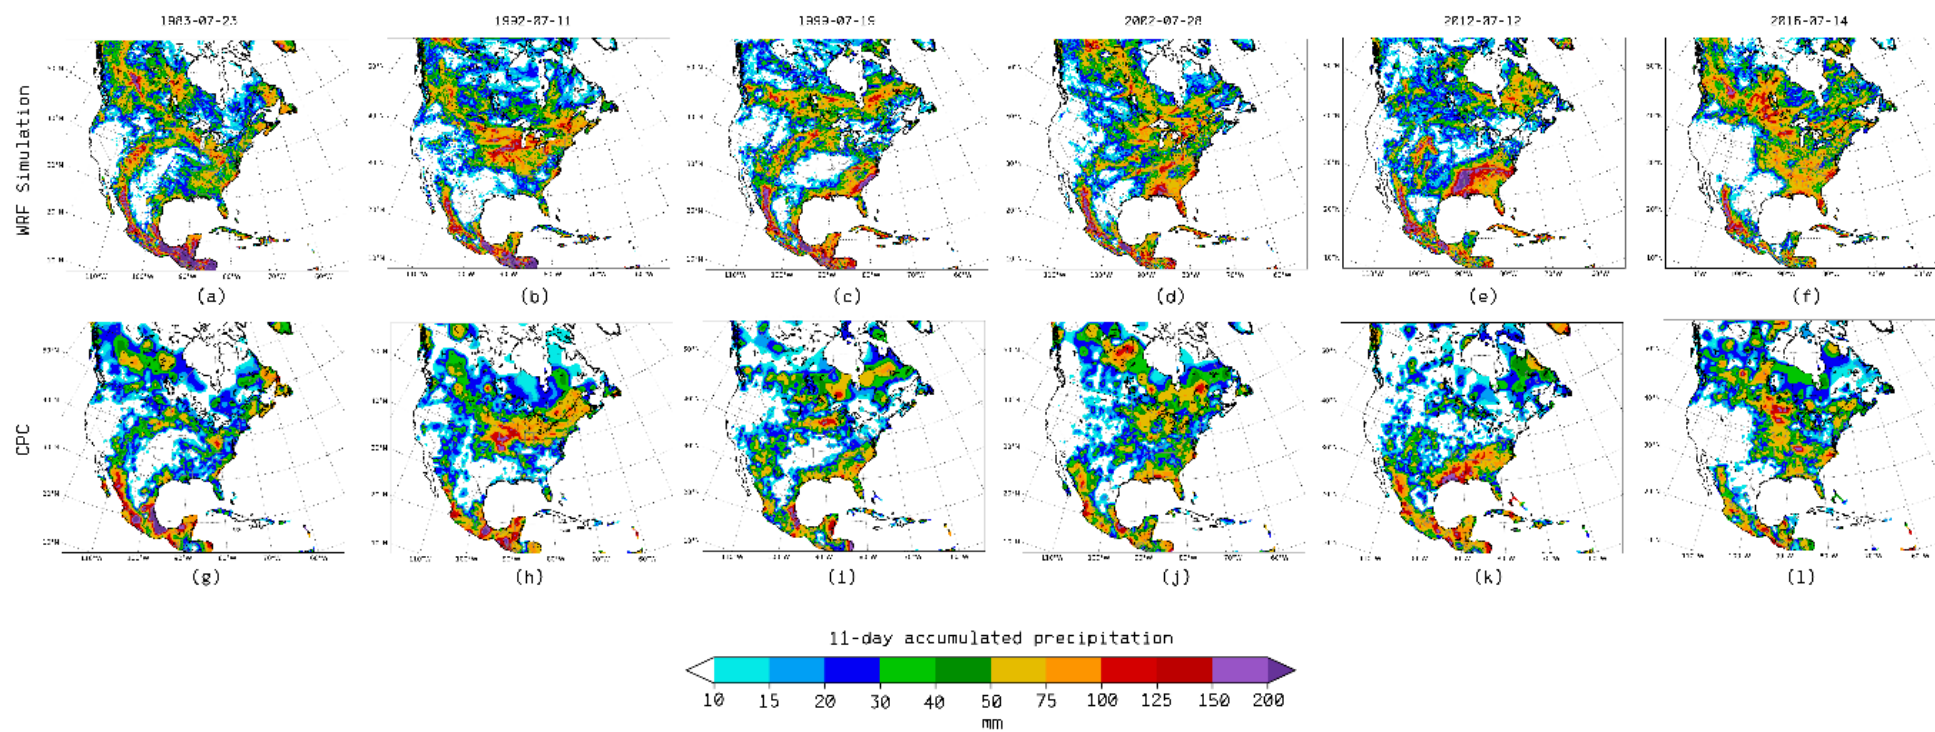

Figure S3

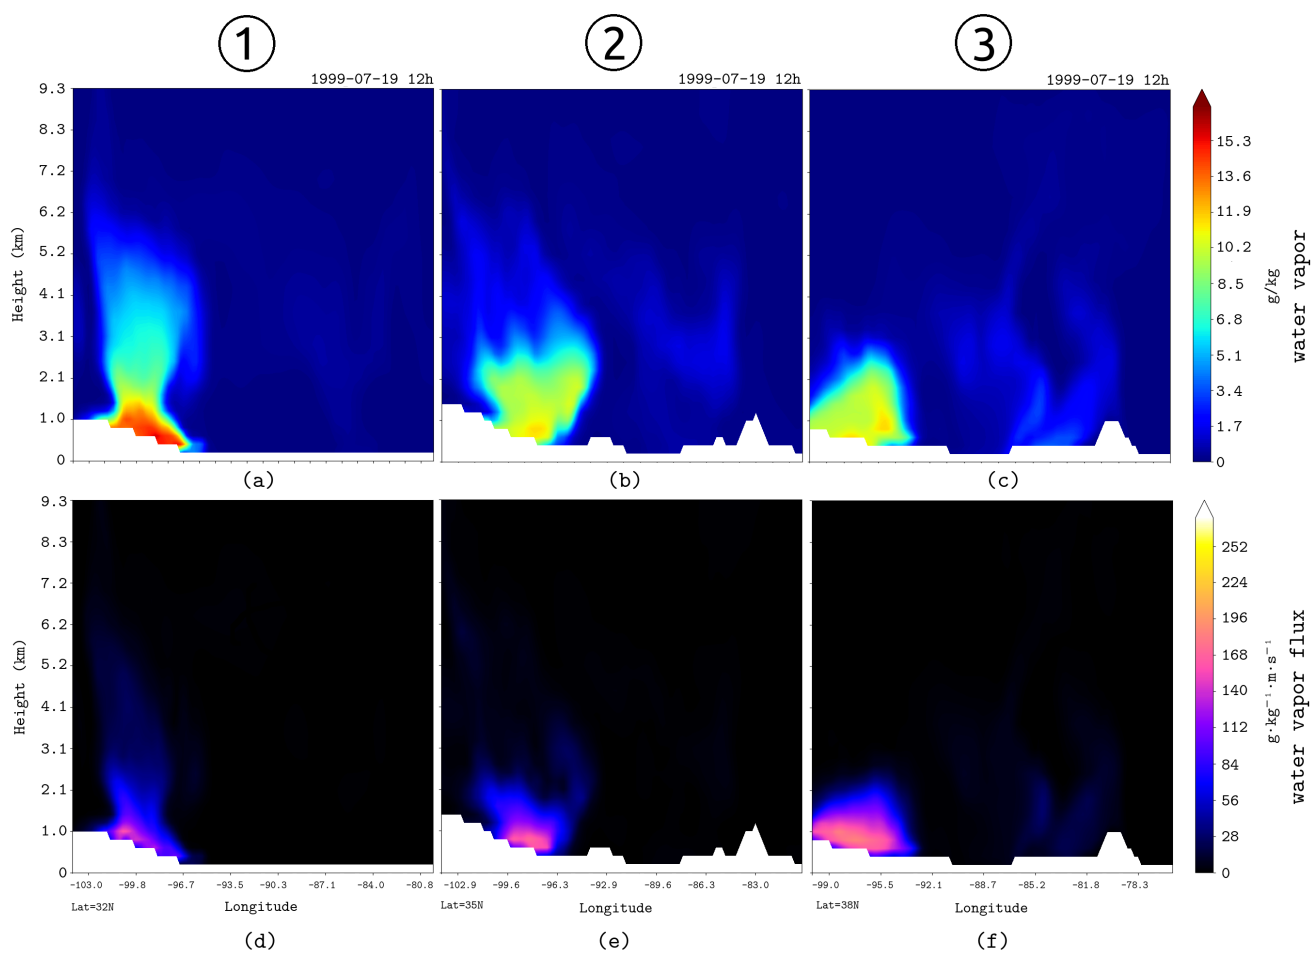

Figure S4

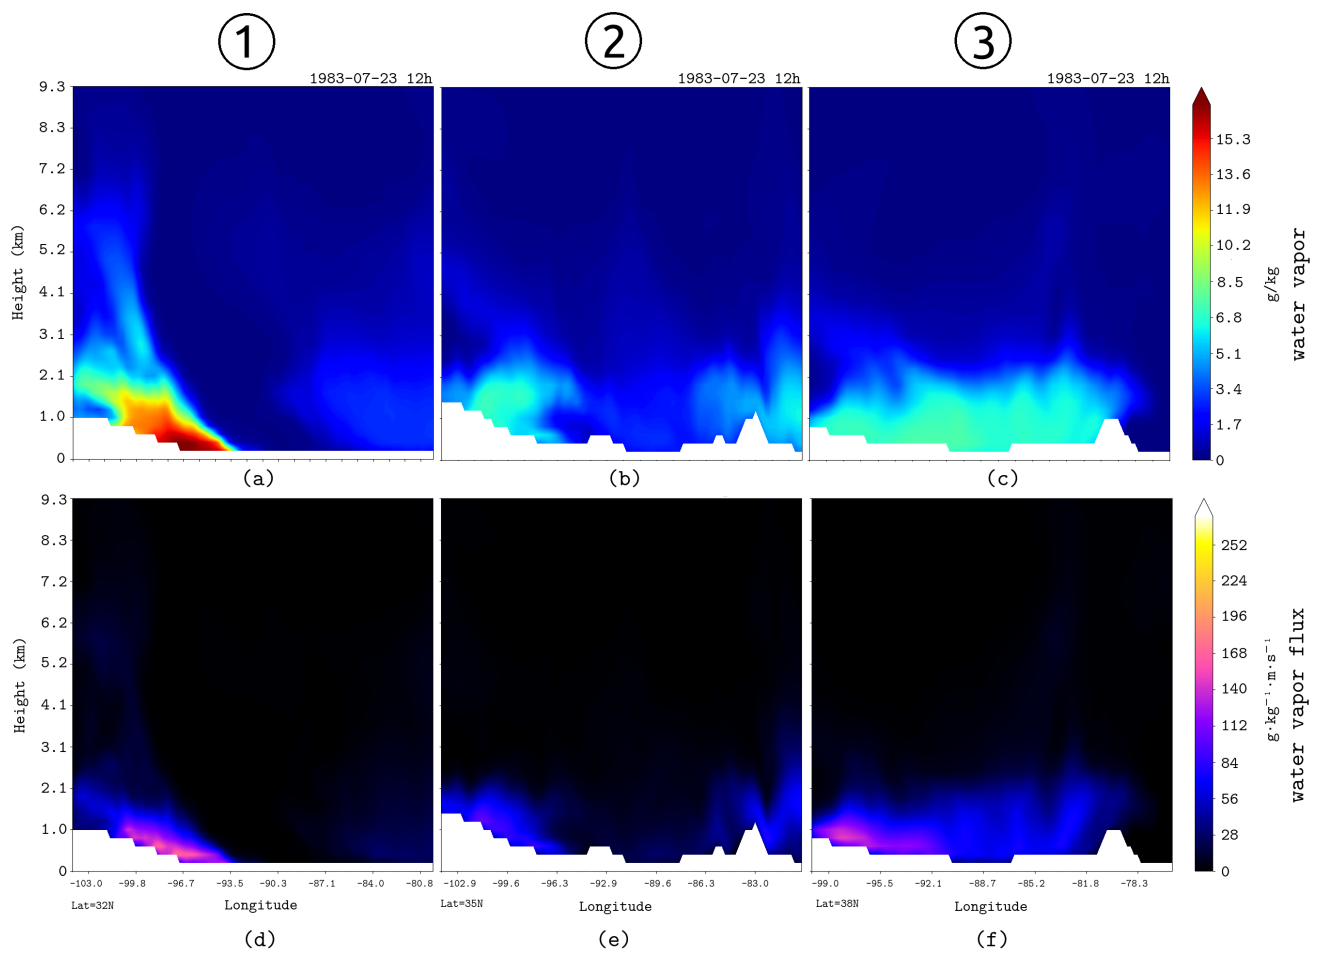

Figure S5

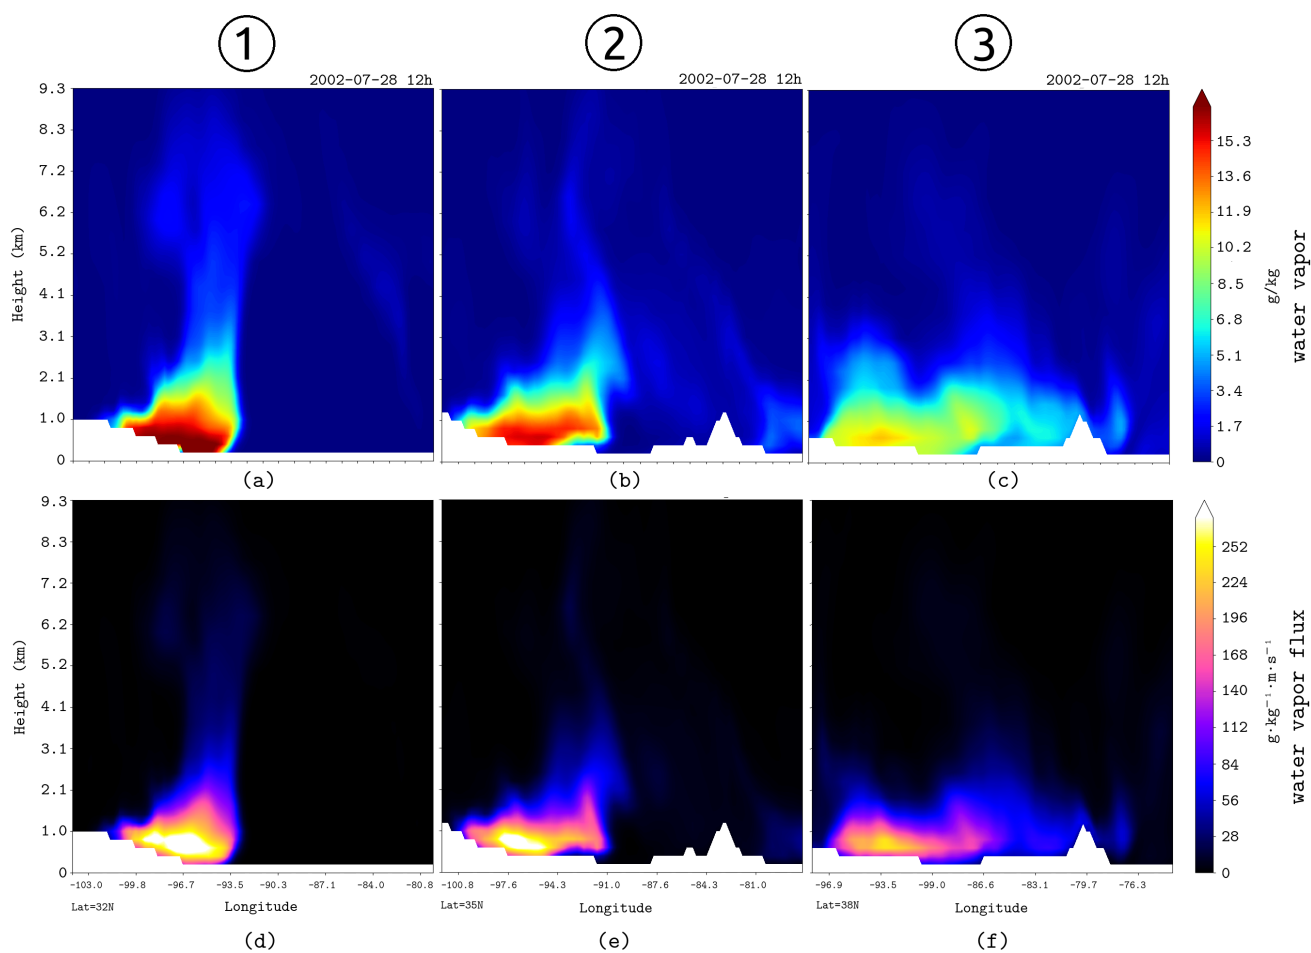

Figure S6



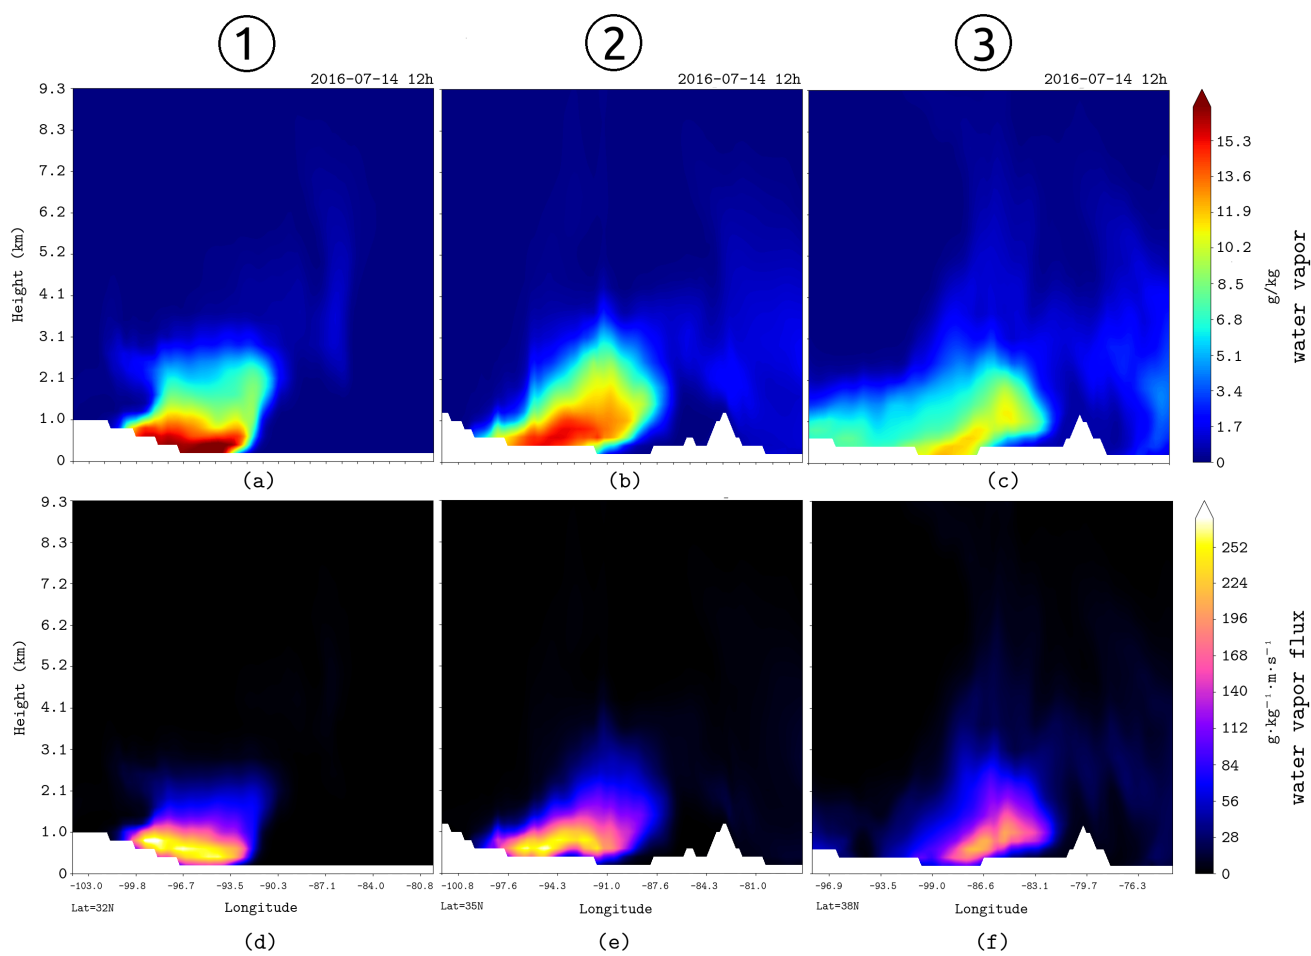

Figure S7
